# Supplementary material for: Psychosocial impact of the COVID-19 pandemic on 4378 UK healthcare workers and ancillary staff: initial baseline data from a cohort study collected during the first wave of the pandemic
Source: HighWire-hosted journal article supplement (doi:10.1136/oemed-2020-107276), 2021-06-28
Supplement: oemed-2020-107276supp001_data_supplement.pdf [file oemed-2020-107276supp001_data_supplement.pdf]

## Supplementary tables

Supplementary table 1 Weighted and unweighted socio-demographics (n=4,378)

| Variable                                             | n     | Unweighted % | Weighted % |
|------------------------------------------------------|-------|--------------|------------|
| Age (years)                                          |       |              |            |
| <30                                                  | 985   | 23.8         | 24.2       |
| 31-40                                                | 1,138 | 27.5         | 30.7       |
| 41-50                                                | 979   | 23.7         | 23.5       |
| 51-60                                                | 861   | 20.8         | 20.8       |
| ≥61                                                  | 171   | 4.1          | 4.1        |
| Sex                                                  |       |              |            |
| Female                                               | 3,485 | 80.3         | 74.8       |
| Male                                                 | 833   | 19.2         | 24.6       |
| Other                                                | 6     | 0.1          | 0.2        |
| Prefer not to say                                    | 18    | 0.4          | 0.5        |
| Relationship status                                  |       |              |            |
| Married/Civil partnership                            | 1,827 | 42.3         | 42.2       |
| Co-habiting/in a relationship                        | 1,129 | 26.1         | 23.2       |
| Divorced/separated/widowed                           | 251   | 5.8          | 6.3        |
| Single                                               | 1,114 | 25.8         | 28.3       |
| Ethnicity                                            |       |              |            |
| White                                                | 3,263 | 74.5         | 53.5       |
| Black/African/Caribbean/Black British                | 373   | 8.5          | 20.8       |
| Asian/Asian British                                  | 482   | 11.0         | 17.4       |
| Mixed/Multiple racial and ethnic minority groups     | 173   | 4.0          | 3.8        |
| Other racial and ethnic minority groups <sup>a</sup> | 90    | 2.1          | 4.5        |
| Country of birth                                     |       |              |            |
| UK                                                   | 2,974 | 68.9         | 61.0       |
| EU not UK)                                           | 525   | 12.2         | 9.8        |
| Other                                                | 815   | 18.9         | 29.2       |
| Length of time living in the UK                      |       |              |            |
| <1-2 years                                           | 106   | 8.0          | 7.8        |
| 3-5 years                                            | 163   | 12.2         | 10.9       |
| 6-10 years                                           | 210   | 15.8         | 14.5       |
| 11-20 years                                          | 404   | 30.3         | 32.5       |
| 21-29 years                                          | 223   | 16.7         | 17.1       |
| >30 years                                            | 220   | 16.5         | 16.5       |
| Prefer not to say                                    | 7     | 0.5          | 0.7        |
| Main role                                            |       |              |            |
| Doctor                                               | 557   | 12.9         | 12.8       |
| Nurse                                                | 1,108 | 25.6         | 26.7       |
| Other clinical                                       | 1,306 | 30.2         | 28.3       |
| Non-clinical                                         | 1,358 | 31.4         | 32.3       |

<sup>a</sup> 'Other racial and ethnic minority groups' includes the options 'Arab' and 'Any other ethnic background'.

Supplementary table 2 Socio-demographics of short-survey-only and short-and-long-survey participants

| Variable                        | Short-survey only<br>n (%) <sup>a</sup>              | Short- and long-survey<br>n (%) <sup>a</sup> | Significant differences<br>p= |
|---------------------------------|------------------------------------------------------|----------------------------------------------|-------------------------------|
| Age (years)                     |                                                      |                                              |                               |
|                                 | ≤30                                                  | 464 (23.4)                                   | 0.31                          |
|                                 | 31-40                                                | 574 (31.0)                                   |                               |
|                                 | 41-50                                                | 522 (24.9)                                   |                               |
|                                 | 51-60                                                | 419 (16.7)                                   |                               |
|                                 | ≥61                                                  | 86 (4.0)                                     |                               |
| Sex                             |                                                      |                                              |                               |
|                                 | Female                                               | 1,691 (72.1)                                 | 0.001                         |
|                                 | Male                                                 | 473 (27.5)                                   |                               |
|                                 | Other                                                | 1 (<1)                                       |                               |
|                                 | Prefer not to say                                    | 10 (<1)                                      |                               |
| Relationship status             |                                                      |                                              |                               |
|                                 | Married/Civil partnership                            | 930 (42.3)                                   | 0.24                          |
|                                 | Co-habiting/in a relationship                        | 538 (21.9)                                   |                               |
|                                 | Divorced/separated/widowed                           | 128 (6.8)                                    |                               |
|                                 | Single                                               | 566 (29.1)                                   |                               |
| Ethnicity                       |                                                      |                                              |                               |
|                                 | White                                                | 1,530 (48.4)                                 | <0.0001                       |
|                                 | Black/African/Caribbean/Black British                | 219 (22.7)                                   |                               |
|                                 | Asian/Asian British                                  | 283 (20.0)                                   |                               |
|                                 | Mixed/Multiple racial and ethnic minority groups     | 83 (3.5)                                     |                               |
|                                 | Other racial and ethnic minority groups <sup>b</sup> | 55 (5.3)                                     |                               |
| Country of birth                |                                                      |                                              |                               |
|                                 | UK                                                   | 1,440 (58.2)                                 | 0.0007                        |
|                                 | EU (not UK)                                          | 267 (9.6)                                    |                               |
|                                 | Other                                                | 454 (32.2)                                   |                               |
| Length of time living in the UK |                                                      |                                              |                               |
|                                 | <1-2 years                                           | 59 (8.1)                                     | 0.49                          |
|                                 | 3-5 years                                            | 85 (10.9)                                    |                               |
|                                 | 6-10 years                                           | 102 (12.9)                                   |                               |
|                                 | 11-20 years                                          | 230 (33.9)                                   |                               |
|                                 | 21-29 years                                          | 120 (17.1)                                   |                               |
|                                 | >30 years                                            | 117 (16.2)                                   |                               |
|                                 | Prefer not to say                                    | 5 (1.0)                                      |                               |
| Main role                       |                                                      |                                              |                               |
|                                 | Doctor                                               | 316 (13.9)                                   | 0.001                         |
|                                 | Nurse                                                | 479 (23.7)                                   |                               |
|                                 | Other clinical                                       | 691 (29.7)                                   |                               |
|                                 | Non-clinical                                         | 677 (32.8)                                   |                               |

<sup>a</sup> Numbers are unweighted, proportions are weighted.

<sup>b</sup> 'Other racial and ethnic minority groups' includes the options 'Arab' and 'Any other ethnic background'.

Supplementary table 3 Prevalence of mental health outcomes by socio-demographic factors<sup>a</sup>

| Characteristic                          | Probable common mental disorders % (95%CI) | Probable anxiety % (95%CI) | Probable depression % (95%CI) | Probable alcohol misuse % (95%CI) | Probable PTSD % (95%CI) | Perceived moral injury Mean (95%CI) |
|-----------------------------------------|--------------------------------------------|----------------------------|-------------------------------|-----------------------------------|-------------------------|-------------------------------------|
| <b>Age years)</b>                       | <b>n=3,785***</b>                          | <b>n=2,369***</b>          | <b>n=2,368***</b>             | n=2,219                           | <b>n=2,351***</b>       | <b>n=2,304 **</b>                   |
| ≤30                                     | 67.5 [63.8, 70.9]                          | 31.3 (27.0, 35.9)          | 35.3 (30.9, 40.1)             | 11.7 (9.1, 15.0)                  | 35.8 (31.4, 40.5)       | 16.0 (15.2, 16.8)                   |
| 31-40                                   | 60.8 [57.2, 64.2]                          | 24.2 (20.6, 28.1)          | 30.6 (26.6, 34.8)             | 11.0 (8.7, 13.9)                  | 32.3 (28.3, 36.5)       | 15.9 (15.0, 16.7)                   |
| 41-50                                   | 58.5 [54.4, 62.4]                          | 22.0 (18.0, 26.5)          | 23.6 (19.6, 28.2)             | 9.2 (7.0, 12.1)                   | 30.6 (25.9, 35.7)       | 15.6 (14.7, 16.5)                   |
| 51-60                                   | 49.9 [45.6, 54.2]                          | 17.7 (13.9, 22.3)          | 20.7 (16.7, 25.3)             | 10.0 (7.3, 13.5)                  | 21.9 (17.8, 26.6)       | 14.5 (13.7, 15.2)                   |
| ≥61                                     | 43.0 [33.1, 53.5]                          | 6.8 (3.4, 13.1)            | 12.7 (7.4, 20.9)              | 8.9 (4.4, 17.2)                   | 19.3 (11.2, 31.3)       | 14.4 (12.5, 16.2)                   |
| <b>Sex</b>                              | <b>n=3,965***</b>                          | <b>n=2,471*</b>            | n=2,466                       | =2,308                            | <b>n=2,447**</b>        | n=2,399                             |
| Female                                  | 62.2 (60.2, 64.3)                          | 24.8 (22.6, 27.1)          | 28.8 (26.5, 31.2)             | 9.5 (8.2, 11.0)                   | 32.4 (30.0, 35.0)       | 15.3 (14.9, 15.7)                   |
| Male                                    | 48.7 (44.5, 52.9)                          | 18.2 (14.4, 22.7)          | 22.5 (18.4, 27.3)             | 13.8 (10.7, 17.6)                 | 23.6 (19.2, 28.5)       | 16.3 (15.3, 17.4)                   |
| Other                                   | 58.6 (19.3, 89.3)                          | 32.3 (7.0, 75.0)           | 32.3 (7.1, 75.0)              | 0                                 | 15.9 (2.0, 63.5)        | 19.2 (9.7, 28.8)                    |
| Prefer not to say                       | 67.0 (34.7, 88.6)                          | 23.9 (4.9, 65.7)           | 30.2 (7.5, 70.0)              | 0                                 | 9.8 (1.2, 50.4)         | 14.1 (9.1, 19.1)                    |
| <b>Relationship status</b>              | <b>n=3,953</b>                             | <b>n=2,463*</b>            | <b>n=2,459***</b>             | <b>n=2,301***</b>                 | <b>n=2,440***</b>       | <b>n=2,392**</b>                    |
| Married/Civil partnership               | 55.7 (52.8, 58.5)                          | 20.0 (17.2, 23.0)          | 21.9 (19.1, 25.0)             | 8.6 (7.0, 10.6)                   | 25.1 (22.1, 28.4)       | 14.9 (14.3, 15.5)                   |
| Co-habiting/in a relationship           | 61.3 (57.7, 64.8)                          | 26.5 (22.9, 30.5)          | 30.4 (26.5, 34.5)             | 14.2 (11.5, 17.6)                 | 34.8 (30.7, 39.2)       | 15.6 (14.8, 16.3)                   |
| Divorced/separated/widowed              | 59.8 (51.5, 67.6)                          | 21.4 (14.6, 30.1)          | 23.3 (16.4, 32.0)             | 3.6 (1.6, 7.7)                    | 39.7 (30.1, 50.1)       | 16.3 (14.8, 17.8)                   |
| Single                                  | 61.9 (58.2, 65.4)                          | 25.6 (21.6, 30.1)          | 33.7 (29.3, 38.4)             | 11.4 (8.8, 14.5)                  | 32.1 (27.8, 36.6)       | 16.4 (15.5, 17.3)                   |
| <b>Ethnicity</b>                        | <b>n=3,958</b>                             | <b>n=2,466</b>             | <b>n=2,461</b>                | <b>n=2,303***</b>                 | <b>n=2,442</b>          | <b>n=2,394***</b>                   |
| White                                   | 59.6 (57.6, 61.4)                          | 22.6 (20.7, 24.7)          | 27.5 (25.4, 29.7)             | 14.5 (12.8, 16.4)                 | 29.5 (27.3, 31.7)       | 14.9 (14.5, 15.4)                   |
| Black/African/Caribbean/Black British   | 58.4 (52.8, 63.9)                          | 24.7 (18.5, 32.1)          | 21.9 (16.0, 29.1)             | 4.1 (1.9, 8.4)                    | 31.1 (24.3, 38.97)      | 15.3 (14.1, 16.4)                   |
| Asian/Asian British                     | 55.9 (50.8, 60.8)                          | 24.2 (18.9, 30.5)          | 30.6 (24.6, 37.2)             | 4.9 (2.5, 9.3)                    | 32.1 (26.1, 38.8)       | 18.0 (16.5, 19.5)                   |
| Mixed/Multiple ethnic groups            | 65.8 (57.7, 73.0)                          | 26.4 (18.3, 36.5)          | 31.3 (22.4, 41.7)             | 8.7 (4.3, 16.9)                   | 33.2 (24.2, 43.5)       | 15.5 (13.8, 17.1)                   |
| Other racial and ethnic minority groups | 59.6 (46.7, 71.3)                          | 17.0 (8.4, 31.5)           | 33.3 (18.9, 51.7)             | 0                                 | 25.8 (13.4, 43.9)       | 16.3 (13.4, 19.2)                   |
| <b>Country of birth</b>                 | <b>n=3,943</b>                             | <b>=2,456</b>              | <b>n=2,451</b>                | <b>n=2,293***</b>                 | <b>n=2,432</b>          | <b>n=2,385</b>                      |
| UK                                      | 58.7 (56.5, 60.9)                          | 22.7 (20.5, 25.0)          | 26.0 (23.7, 28.4)             | 13.0 (11.4, 14.9)                 | 29.1 (26.7, 31.7)       | 15.2 (14.8, 15.7)                   |
| EU not UK)                              | 63.9 (59.1, 68.4)                          | 23.6 (18.8, 29.3)          | 29.7 (24.4, 35.7)             | 7.1 (4.4, 11.4)                   | 33.5 (27.7, 39.8)       | 16.2 (15.0, 17.3)                   |

|                                        |                   |                    |                    |                   |                   |                   |                   |
|----------------------------------------|-------------------|--------------------|--------------------|-------------------|-------------------|-------------------|-------------------|
|                                        | Other             | 58.0 (53.7, 62.2)  | 24.5 (19.8, 29.8)  | 29.5 (24.6, 35.0) | 4.8 (3.1, 7.3)    | 32.0 (28.1, 32.5) | 16.1 (15.1, 17.2) |
| <b>Length of time living in the UK</b> |                   | n=1,176            | n=674              | n=672             | n=627             | n=666             | <b>n=646**</b>    |
|                                        | <1-2 years        | 69.4 (58.4, 78.6)  | 29.1 (17.4, 44.4)  | 40.3 (27.0, 55.2) | 7.0 (2.9, 16.3)   | 34.8 (22.5, 49.6) | 18.4 (15.3, 21.5) |
|                                        | 3-5 years         | 68.7 (59.8, 76.5)  | 27.1 (18.6, 37.6)  | 28.6 (19.8, 39.3) | 4.4 (1.8, 10.5)   | 26.8 (18.4, 37.4) | 17.8 (15.2, 20.3) |
|                                        | 6-10 years        | 57.6 (49.4, 65.4)  | 25.6 (17.8, 35.4)  | 29.7 (21.5, 39.5) | 8.3 (4.3, 15.3)   | 29.7 (21.4, 39.7) | 16.0 (13.7, 18.3) |
|                                        | 11-20 years       | 60.5 (54.3, 66.5)  | 24.2 (17.5, 32.6)  | 27.1 (20.4, 35.0) | 5.3 (2.8, 9.9)    | 37.7 (29.8, 46.2) | 16.0 (14.4, 17.5) |
|                                        | 21-29 years       | 55.1 (46.6, 63.3)  | 20.2 (13.0, 30.1)  | 32.8 (23.0, 44.4) | 5.7 (2.5, 12.5)   | 26.2 (17.8, 36.9) | 15.6 (13.9, 17.2) |
|                                        | >30 years         | 50.8 (42.4, 59.2)  | 19.1 (11.6, 29.9)  | 23.2 (14.5, 35.0) | 2.4 (0.8, 7.3)    | 30.0 (20.3, 42.0) | 14.5 (13.1, 15.9) |
|                                        | Prefer not to say | 61.5 (20.0, 91.1)  | 35.0 (4.6, 85.6)   | 35.1 (4.7, 85.7)  | 7.0 (2.9, 16.3)   | 70.7 (17.9, 96.4) | 14.6 (10.0, 19.1) |
| <b>Main role</b>                       |                   | <b>n=3,964 ***</b> | <b>n=2,480 ***</b> | <b>n=2,465***</b> | n=2,307           | <b>n=2,446***</b> | <b>n=2,398**</b>  |
|                                        | Doctor            | 46.9 (41.8, 52.0)  | 13.6 (9.7, 18.9)   | 15.4 (11.4, 20.4) | 10.2 (6.9, 14.8)  | 18.3 (13.8, 23.8) | 14.4 (13.4, 15.4) |
|                                        | Nurse             | 68.1 (64.6, 71.3)  | 30.2 (26.3, 34.5)  | 33.1 (29.0, 37.4) | 10.2 (8.0, 12.8)  | 36.5 (32.3, 40.9) | 17.4 (16.5, 18.3) |
|                                        | Other clinical    | 59.5 (56.1, 62.9)  | 19.5 (16.3, 23.2)  | 24.0 (20.5, 28.2) | 8.2 (6.3, 10.7)   | 29.0 (25.2, 33.3) | 15.2 (14.4, 16.0) |
|                                        | Non-clinical      | 55.6 (52.2, 59.1)  | 23.8 (20.4, 27.5)  | 29.3 (25.6, 33.2) | 12.6 (10.2, 15.5) | 30.0 (28.1, 32.5) | 14.6 (14.0, 15.3) |

a Numbers are unweighted, proportions are weighted.

Differences within categories are statistically significant at: \*p<0.05, \*\*p<0.01, \*\*\*p<0.001
